# Supplementary material
Source: Elsevier journal article supplement (https://comptes-rendus.academie-sciences.fr/chimie/article/10.1016/j.crci.2011.11.004/file/attach/mmc1.pdf)
Supplement: mmc1 [file mmc1.pdf]

Supplementary Information for “**Three structural modifications in the series of layered solids  $T(H_2O)_2[Ni(CN)_4] \cdot xH_2O$  with  $T = Mn, Co, Ni$ : Their Nature and Crystal Structures**”, by J. Rodríguez-Hernández, A.A. Lemus-Santana, C.N. Vargas, E. Reguera

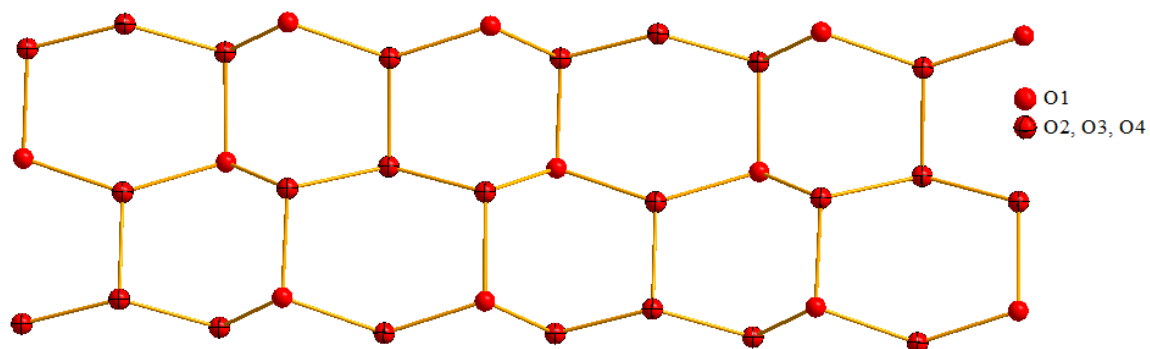

Figure S1: 2D ice-like structure for hydrogen bonded water molecules of  $L_0$  phase:

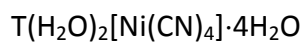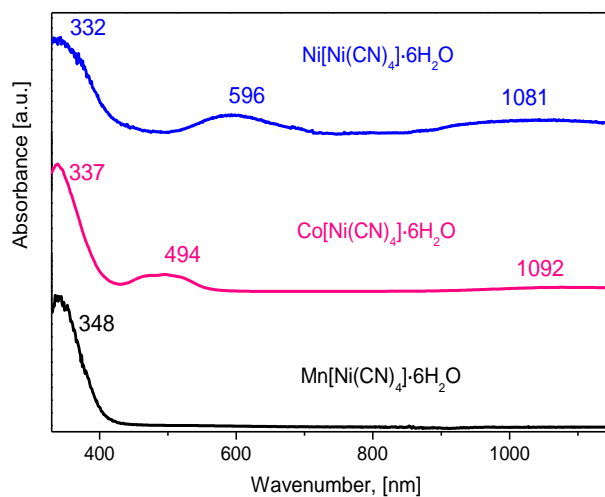

Figure S2: UV-vis spectra for  $T[Ni(CN)_4] \cdot 6H_2O$ ;  $T=Ni, Co, Mn$ . These spectra correspond to octahedral coordination for T metals, respectively.

Table S1: XRD data collection and processing for L0 phase

|                                | Ni(H <sub>2</sub> O) <sub>2</sub> [Ni(CN) <sub>4</sub> ].4H <sub>2</sub> O | Mn(H <sub>2</sub> O) <sub>2</sub> [Ni(CN) <sub>4</sub> ].4H <sub>2</sub> O | Co(H <sub>2</sub> O) <sub>2</sub> [Ni(CN) <sub>4</sub> ].4H <sub>2</sub> O |
|--------------------------------|----------------------------------------------------------------------------|----------------------------------------------------------------------------|----------------------------------------------------------------------------|
| <i>Data collection</i>         |                                                                            |                                                                            |                                                                            |
| Diffractometer                 | Bruker, D8 Advance                                                         | D10B-XPD LNLS (Brazil) beamline;                                           |                                                                            |
| Monochromator                  | graphite (secondary)                                                       | Ge(111) crystal analyzer                                                   |                                                                            |
| Wavelength (Å)                 | CuK $\alpha$ , 1.54183                                                     | 1.54995                                                                    | 1.54995                                                                    |
| 2 $\theta$ range (°)           | 10-90                                                                      | 10-70                                                                      | 10-70                                                                      |
| Step size (°)                  | 0.02                                                                       | 0.008                                                                      | 0.02                                                                       |
| Time per step (s)              | 15                                                                         | 1                                                                          | 1                                                                          |
| <i>Unit cell</i>               |                                                                            |                                                                            |                                                                            |
| Space Group                    | Pnma                                                                       | Pnma                                                                       | Pnma                                                                       |
| Parameter (Å)                  | a= 12.207(4)                                                               | a= 12.304(4)                                                               | a= 12.195(2)                                                               |
|                                | b= 13.860(5)                                                               | b= 14.125(6)                                                               | b= 13.885(3)                                                               |
|                                | c= 7.124(3)                                                                | c= 7.308(6)                                                                | c= 7.143(3)                                                                |
| V(Å <sup>3</sup> )             | 1205.3(4)                                                                  | 1270.1(3)                                                                  | 1209.5(3)                                                                  |
| Z                              | 4                                                                          | 4                                                                          | 4                                                                          |
| <i>Refinement</i>              |                                                                            |                                                                            |                                                                            |
| # of reflections               | 519                                                                        | 240                                                                        | 276                                                                        |
| # of distance constraints      | 4                                                                          | 4                                                                          | 4                                                                          |
| <i># of refined parameters</i> |                                                                            |                                                                            |                                                                            |
| Structural                     | 29                                                                         | 29                                                                         | 29                                                                         |
| Profile                        | 10                                                                         | 10                                                                         | 10                                                                         |
| R <sub>exp</sub>               | 3.7                                                                        | 9.88                                                                       | 10.5                                                                       |
| R <sub>wp</sub>                | 7.2                                                                        | 14.3                                                                       | 19.2                                                                       |
| R <sub>B</sub>                 | 5.17                                                                       | 10.9                                                                       | 16.6                                                                       |
| S                              | 1.95                                                                       | 1.44                                                                       | 1.82                                                                       |

Table S2: XRD data collection and processing for L1 phase

|                                | Ni(H <sub>2</sub> O) <sub>2</sub> [Ni(CN) <sub>4</sub> ].H <sub>2</sub> O | Mn(H <sub>2</sub> O) <sub>2</sub> [Ni(CN) <sub>4</sub> ].H <sub>2</sub> O | Co(H <sub>2</sub> O) <sub>2</sub> [Ni(CN) <sub>4</sub> ].H <sub>2</sub> O |
|--------------------------------|---------------------------------------------------------------------------|---------------------------------------------------------------------------|---------------------------------------------------------------------------|
| <i>Data collection</i>         |                                                                           |                                                                           |                                                                           |
| Diffractometer                 | Bruker, D8 Advance                                                        |                                                                           |                                                                           |
| Monochromator                  | graphite (secondary)                                                      |                                                                           |                                                                           |
| Wavelength (Å)                 | CuKα, 1.54183                                                             |                                                                           |                                                                           |
| 2θ range (°)                   | 5-80                                                                      | 10-80                                                                     | 5-80                                                                      |
| Step size (°)                  | 0.025                                                                     | 0.02                                                                      | 0.02                                                                      |
| Time per step (s)              | 15                                                                        | 15                                                                        | 20                                                                        |
| <i>Unit cell</i>               |                                                                           |                                                                           |                                                                           |
| Space Group                    | Imma                                                                      | Imma                                                                      | Imma                                                                      |
| Parameter (Å)                  | a= 7.091(4)<br>b=14.135(3)<br>c=8.876(5)                                  | a= 7.303(2)<br>b= 14.539(2)<br>c= 9.044(2)                                | a= 7.115(2)<br>b=14.264(3)<br>c=8.898(1)                                  |
| V(Å <sup>3</sup> )             | 889.6(3)                                                                  | 960.3(2)                                                                  | 903.0(2)                                                                  |
| Z                              | 4                                                                         | 4                                                                         | 4                                                                         |
| <i>Refinement</i>              |                                                                           |                                                                           |                                                                           |
| # of reflections               | 163                                                                       | 178                                                                       | 166                                                                       |
| # of distance constraints      | 2                                                                         | 2                                                                         | 2                                                                         |
| <i># of refined parameters</i> |                                                                           |                                                                           |                                                                           |
| Structural                     | 15                                                                        | 15                                                                        | 15                                                                        |
| Profile                        | 10                                                                        | 10                                                                        | 10                                                                        |
| R <sub>exp</sub>               | 7.10                                                                      | 8.75                                                                      | 8.21                                                                      |
| R <sub>wp</sub>                | 13.5                                                                      | 14.2                                                                      | 15.3                                                                      |
| R <sub>B</sub>                 | 9.70                                                                      | 10.7                                                                      | 13.5                                                                      |
| S                              | 1.9                                                                       | 1.62                                                                      | 1.86                                                                      |

Table S3: XRD data collection and processing for K phase

|                                | Ni(H <sub>2</sub> O) <sub>2</sub> [Ni(CN) <sub>4</sub> ].2H <sub>2</sub> O | Mn(H <sub>2</sub> O) <sub>2</sub> [Ni(CN) <sub>4</sub> ].2H <sub>2</sub> O | Co(H <sub>2</sub> O) <sub>2</sub> [Ni(CN) <sub>4</sub> ].2H <sub>2</sub> O |
|--------------------------------|----------------------------------------------------------------------------|----------------------------------------------------------------------------|----------------------------------------------------------------------------|
| <i>Data collection</i>         |                                                                            |                                                                            |                                                                            |
| Diffractometer                 | Bruker, D8 Advance                                                         |                                                                            |                                                                            |
| Monochromator                  | graphite (secondary)                                                       |                                                                            |                                                                            |
| Wavelength (Å)                 | CuKα, 1.54183                                                              |                                                                            |                                                                            |
| 2θ range (°)                   | 10-80                                                                      | 10-80                                                                      | 10-80                                                                      |
| Step size (°)                  | 0.025                                                                      | 0.02                                                                       | 0.02                                                                       |
| Time per step (s)              | 15                                                                         | 15                                                                         | 15                                                                         |
| <i>Unit cell</i>               |                                                                            |                                                                            |                                                                            |
| Space Group                    | P4/mmm                                                                     | P4/mmm                                                                     | P4/mmm                                                                     |
| Parameter (Å)                  | a= b= 7.145(2)<br>c= 10.116(2)                                             | a= b= 7.279(2)<br>c= 10.291(2)                                             | a= b= 7.182(3)<br>c= 10.139(2)                                             |
| V(Å <sup>3</sup> )             | 516.4(1)                                                                   | 545.3(2)                                                                   | 523.0(3)                                                                   |
| Z                              | 2                                                                          | 2                                                                          | 2                                                                          |
| <i>Refinement</i>              |                                                                            |                                                                            |                                                                            |
| # of reflections               | 122                                                                        | 128                                                                        | 122                                                                        |
| # of distance constraints      | 4                                                                          | 4                                                                          | 4                                                                          |
| <i># of refined parameters</i> |                                                                            |                                                                            |                                                                            |
| Structural                     | 12                                                                         | 12                                                                         | 12                                                                         |
| Profile                        | 10                                                                         | 10                                                                         | 10                                                                         |
| R <sub>exp</sub>               | 5.65                                                                       | 4.74                                                                       | 7.14                                                                       |
| R <sub>wp</sub>                | 11.0                                                                       | 9.48                                                                       | 12.1                                                                       |
| R <sub>B</sub>                 | 11.5                                                                       | 8.45                                                                       | 9.1                                                                        |
| S                              | 1.94                                                                       | 2.0                                                                        | 1.69                                                                       |

Table S4: Refined atomic positions and thermal and occupation factors for L0 phase

| Composition                                                               | site | x        | y        | z         | B <sub>iso</sub> | Occ |
|---------------------------------------------------------------------------|------|----------|----------|-----------|------------------|-----|
| <b>Ni(H<sub>2</sub>O)<sub>2</sub>[Ni(CN)<sub>4</sub>].4H<sub>2</sub>O</b> |      |          |          |           |                  |     |
| Ni <sub>OH</sub>                                                          | 4a   | 0.5      | 0.5      | 0.5       | 1.78(2)          | 1   |
| Ni <sub>CN</sub>                                                          | 4c   | 0.430(3) | 0.25     | 0.036(3)  | 1.78(2)          | 1   |
| C1                                                                        | 8d   | 0.433(3) | 0.347(2) | 0.218(3)  | 2.3(1)           | 1   |
| N1                                                                        | 8d   | 0.434(2) | 0.407(2) | 0.329(3)  | 2.3(1)           | 1   |
| C2                                                                        | 8d   | 0.456(4) | 0.340(3) | -0.154(4) | 2.3(1)           | 1   |
| N2                                                                        | 8d   | 0.472(3) | 0.396(3) | -0.272(3) | 2.3(1)           | 1   |
| O1                                                                        | 8d   | 0.663(2) | 0.425(4) | 0.460(2)  | 3.7(2)           | 1   |
| O2                                                                        | 8d   | 0.684(2) | 0.429(1) | 0.023(2)  | 3.7(2)           | 1   |
| O3                                                                        | 4c   | 0.728(1) | 0.25     | 0.918(2)  | 3.7(2)           | 1   |
| O4                                                                        | 4c   | 0.704(1) | 0.25     | 0.566(2)  | 3.7(2)           | 1   |
| <b>Mn(H<sub>2</sub>O)<sub>2</sub>[Ni(CN)<sub>4</sub>].4H<sub>2</sub>O</b> |      |          |          |           |                  |     |
| Mn                                                                        | 4a   | 0.5      | 0.5      | 0.5       | 2.05(2)          | 1   |
| Ni                                                                        | 4c   | 0.434(2) | 0.25     | 0.009(2)  | 1.94(2)          | 1   |
| C1                                                                        | 8d   | 0.443(3) | 0.346(4) | 0.184(2)  | 2.5(1)           | 1   |
| N1                                                                        | 8d   | 0.439(4) | 0.398(3) | 0.308(3)  | 2.5(1)           | 1   |
| C2                                                                        | 8d   | 0.463(3) | 0.341(3) | -0.171(2) | 2.5(1)           | 1   |
| N2                                                                        | 8d   | 0.477(4) | 0.398(2) | -0.278(3) | 2.5(1)           | 1   |
| O1                                                                        | 8d   | 0.661(2) | 0.439(3) | 0.442(1)  | 3.1(3)           | 1   |
| O2                                                                        | 8d   | 0.678(1) | 0.432(4) | 0.043(3)  | 3.1(3)           | 1   |
| O3                                                                        | 4c   | 0.742(1) | 0.25     | 0.936(2)  | 3.1(3)           | 1   |
| O4                                                                        | 4c   | 0.707(1) | 0.25     | 0.559(3)  | 3.1(3)           | 1   |

Table S5: Refined atomic positions and thermal and occupation factors for L1 phase

| Composition                                                              | site | x        | y        | z        | B <sub>iso</sub> | Occ |
|--------------------------------------------------------------------------|------|----------|----------|----------|------------------|-----|
| <b>Ni(H<sub>2</sub>O)<sub>2</sub>[Ni(CN)<sub>4</sub>].H<sub>2</sub>O</b> |      |          |          |          |                  |     |
| Ni <sub>OH</sub>                                                         | 4a   | 0        | 0        | 0        | 1.19(3)          | 1   |
| Ni <sub>CN</sub>                                                         | 4e   | 0.5      | 0.25     | 0.053(3) | 1.25(2)          | 1   |
| C                                                                        | 16j  | 0.307(3) | 0.156(3) | 0.044(2) | 3.2(3)           | 1   |
| N                                                                        | 16j  | 0.192(2) | 0.101(3) | 0.039(2) | 3.2(3)           | 1   |
| O1                                                                       | 8h   | 0        | 0.035(3) | 0.765(5) | 3.8(3)           | 1   |
| O2                                                                       | 4e   | 0        | 0.25     | 0.789(4) | 3.8(3)           | 1   |
| <b>Mn(H<sub>2</sub>O)<sub>2</sub>[Ni(CN)<sub>4</sub>].H<sub>2</sub>O</b> |      |          |          |          |                  |     |
| Mn                                                                       | 4a   | 0        | 0        | 0        | 1.56(2)          | 1   |
| Ni                                                                       | 4e   | 0.5      | 0.25     | 0.046(2) | 1.92(2)          | 1   |
| C                                                                        | 16j  | 0.319(2) | 0.158(3) | 0.045(3) | 2.5(1)           | 1   |
| N                                                                        | 16j  | 0.208(2) | 0.102(3) | 0.044(3) | 2.5(1)           | 1   |
| O1                                                                       | 8h   | 0        | 0.028(3) | 0.764(1) | 3.4(2)           | 1   |
| O2                                                                       | 4e   | 0        | 0.25     | 0.809(1) | 3.4(2)           | 1   |
| <b>Co(H<sub>2</sub>O)<sub>2</sub>[Ni(CN)<sub>4</sub>].H<sub>2</sub>O</b> |      |          |          |          |                  |     |
| Co                                                                       | 4a   | 0        | 0        | 0        | 1.43(1)          | 1   |
| Ni                                                                       | 4e   | 0.5      | 0.25     | 0.058(2) | 1.85(1)          | 1   |
| C                                                                        | 16j  | 0.321(3) | 0.156(1) | 0.048(4) | 2.8(1)           | 1   |
| N                                                                        | 16j  | 0.204(2) | 0.101(3) | 0.030(2) | 2.8(1)           | 1   |
| O1                                                                       | 8h   | 0        | 0.030(2) | 0.768(3) | 3.2(2)           | 1   |
| O2                                                                       | 4e   | 0        | 0.25     | 0.812(3) | 3.2(2)           | 1   |

Table S6: Refined atomic positions and thermal and occupation factors for K phase

| Composition                                                               | site | x        | y        | z        | Biso    | Occ |
|---------------------------------------------------------------------------|------|----------|----------|----------|---------|-----|
| <b>Ni(H<sub>2</sub>O)<sub>2</sub>[Ni(CN)<sub>4</sub>].2H<sub>2</sub>O</b> |      |          |          |          |         |     |
| Ni <sub>1CN</sub>                                                         | 1c   | 0.5      | 0.5      | 0        | 1.05(1) | 1   |
| Ni <sub>2CN</sub>                                                         | 1b   | 0        | 0        | 0.5      | 1.05(1) | 1   |
| Ni <sub>1OH</sub>                                                         | 1a   | 0        | 0        | 0        | 1.05(1) | 1   |
| Ni <sub>2OH</sub>                                                         | 1d   | 0.5      | 0.5      | 0.5      | 1.05(1) | 1   |
| C1                                                                        | 4j   | 0.311(2) | 0.311(2) | 0        | 3.3(2)  | 1   |
| N1                                                                        | 4j   | 0.198(3) | 0.198(3) | 0        | 3.3(2)  | 1   |
| C2                                                                        | 4k   | 0.189(2) | 0.189(2) | 0.5      | 3.3(2)  | 1   |
| N2                                                                        | 4k   | 0.302(2) | 0.302(2) | 0.5      | 3.3(2)  | 1   |
| O1                                                                        | 2g   | 0        | 0        | 0.232(3) | 3.7(2)  | 1   |
| O2                                                                        | 4h   | 0.5      | 0.5      | 0.271(2) | 3.7(2)  | 1   |
| O3                                                                        | 4i   | 0.5      | 0        | 0.248(3) | 3.7(2)  | 1   |
| <b>Mn(H<sub>2</sub>O)<sub>2</sub>[Ni(CN)<sub>4</sub>].2H<sub>2</sub>O</b> |      |          |          |          |         |     |
| Ni1                                                                       | 1c   | 0.5      | 0.5      | 0        | 1.53(2) | 1   |
| Ni2                                                                       | 1b   | 0        | 0        | 0.5      | 1.53(2) | 1   |
| Mn1                                                                       | 1a   | 0        | 0        | 0        | 1.62(2) | 1   |
| Mn2                                                                       | 1d   | 0.5      | 0.5      | 0.5      | 1.62(2) | 1   |
| C1                                                                        | 4j   | 0.315(2) | 0.315(2) | 0        | 2.8(3)  | 1   |
| N1                                                                        | 4j   | 0.204(2) | 0.204(2) | 0        | 2.8(3)  | 1   |
| C2                                                                        | 4k   | 0.185(1) | 0.185(1) | 0.5      | 2.8(3)  | 1   |
| N2                                                                        | 4k   | 0.296(2) | 0.296(2) | 0.5      | 2.8(3)  | 1   |
| O1                                                                        | 2g   | 0        | 0        | 0.229(5) | 3.6(3)  | 1   |
| O2                                                                        | 4h   | 0.5      | 0.5      | 0.270(5) | 3.6(3)  | 1   |
| O3                                                                        | 4i   | 0.5      | 0        | 0.247(4) | 3.6(3)  | 1   |
| <b>Co(H<sub>2</sub>O)<sub>2</sub>[Ni(CN)<sub>4</sub>].2H<sub>2</sub>O</b> |      |          |          |          |         |     |
| Ni1                                                                       | 1c   | 0.5      | 0.5      | 0        | 1.32(1) | 1   |
| Ni2                                                                       | 1b   | 0        | 0        | 0.5      | 1.32(1) | 1   |
| Co1                                                                       | 1a   | 0        | 0        | 0        | 1.26(1) | 1   |
| Co2                                                                       | 1d   | 0.5      | 0.5      | 0.5      | 1.26(1) | 1   |
| C1                                                                        | 4j   | 0.312(2) | 0.312(2) | 0        | 2.4(2)  | 1   |
| N1                                                                        | 4j   | 0.200(3) | 0.200(3) | 0        | 2.4(2)  | 1   |
| C2                                                                        | 4k   | 0.187(1) | 0.187(1) | 0.5      | 2.4(2)  | 1   |
| N2                                                                        | 4k   | 0.301(2) | 0.301(2) | 0.5      | 2.4(2)  | 1   |
| O1                                                                        | 2g   | 0        | 0        | 0.236(5) | 3.2(2)  | 1   |
| O2                                                                        | 4h   | 0        | 0        | 0.272(4) | 3.2(2)  | 1   |
| O3                                                                        | 4i   | 0.5      | 0        | 0.246(5) | 3.2(2)  | 1   |

Table S7. Calculated interatomic distances (in Å) and bond angles (in °) for L0 phase.

| Bond distance (Å)                                                          | Angles (°)                         |                                    |
|----------------------------------------------------------------------------|------------------------------------|------------------------------------|
| <b>Ni(H<sub>2</sub>O)<sub>2</sub>[Ni(CN)<sub>4</sub>].4 H<sub>2</sub>O</b> |                                    |                                    |
| Ni <sub>CN</sub> -C1= 1.869(1)                                             | C1-Ni <sub>CN</sub> -C2= 91.0(5)   | N1-Ni <sub>OH</sub> -N2'=91.7(2)   |
| Ni <sub>CN</sub> -C2= 1.872(2)                                             | C1-Ni <sub>CN</sub> -C1'=92.3(2)   | N1- Ni <sub>OH</sub> -O1= 90.9(2)  |
| Ni <sub>OH</sub> -N1= 1.936(1)                                             | C1-Ni <sub>CN</sub> -C2'= 168.5(3) | N1- Ni <sub>OH</sub> -O1'= 89.1(2) |
| Ni <sub>OH</sub> -N2= 2.189(2)                                             | C2-Ni <sub>CN</sub> -C2'= 83.8(2)  | N2- Ni <sub>OH</sub> -O1= 85.9(2)  |
| Ni <sub>OH</sub> -O1= 2.258(1)                                             | Ni <sub>CN</sub> -C1-N1= 179.6(3)  | N2- Ni <sub>OH</sub> -O1'= 94.1(1) |
| C1-N1= 1.153(1)                                                            | Ni <sub>CN</sub> -C2-N2= 179.7(3)  | Ni <sub>OH</sub> -N1-C1= 156.9(3)  |
| C2-N2= 1.167(1)                                                            | N1-Ni <sub>OH</sub> -N2= 88.3(4)   | Ni <sub>OH</sub> -N2-C2= 178.2(3)  |
| <b>Mn(H<sub>2</sub>O)<sub>2</sub>[Ni(CN)<sub>4</sub>].4H<sub>2</sub>O</b>  |                                    |                                    |
| Ni-C1= 1.871(2)                                                            | C1-Ni-C2= 88.4(1)                  | N1- Mn-N2'=89.8(3)                 |
| Ni-C2= 1.870(3)                                                            | C1-Ni-C1'=93.2(1)                  | N1- Mn-O1= 85.9(3)                 |
| Mn-N1= 2.138(2)                                                            | C1-Ni-C2'= 166.1(1)                | N1- Mn-O1'= 94.1(3)                |
| Mn-N2= 2.180(2)                                                            | C2-Ni-C2'= 86.8(1)                 | N2- Mn-O1= 90.3(2)                 |
| Mn-O1= 2.201(5)                                                            | Ni-C1-N1= 171.0(2)                 | N2- Mn-O1'= 89.7(1)                |
| C1-N1= 1.169(4)                                                            | Ni-C2-N2= 177.4(2)                 | Mn-N1-C1= 156.7(2)                 |
| C2-N2= 1.144(4)                                                            | N1-Mn-N2= 90.2(1)                  | Mn-N2-C2= 175.2(2)                 |

Table S8. Calculated interatomic distances (in Å) and bond angles (in °) for L1 phase.

| Bond distance (Å)                                                         | Angles (°)                       |                                   |
|---------------------------------------------------------------------------|----------------------------------|-----------------------------------|
| <b>Ni(H<sub>2</sub>O)<sub>2</sub>[Ni(CN)<sub>4</sub>].1H<sub>2</sub>O</b> |                                  |                                   |
| Ni <sub>CN</sub> -C=1.909(2)                                              | C-Ni <sub>CN</sub> -C'=88.2(2)   | N- Ni <sub>OH</sub> -N'=94.3(2)   |
| Ni <sub>OH</sub> -N=2.003(2)                                              | C-Ni <sub>CN</sub> -C''=175.0(3) | N- Ni <sub>OH</sub> -N''=180      |
| Ni <sub>OH</sub> -O1=2.144(2)                                             | C-Ni <sub>CN</sub> -C'''=91.6(3) | N- Ni <sub>OH</sub> -N'''=85.6(3) |
| C-N=1.127(1)                                                              | Ni <sub>CN</sub> -C-N=179.4(4)   | N- Ni <sub>OH</sub> -O1=90.2(4)   |
|                                                                           | Ni <sub>OH</sub> -N-C=171.8(4)   | N- Ni <sub>OH</sub> -O1'=89.8(3)  |
| <b>Mn(H<sub>2</sub>O)<sub>2</sub>[Ni(CN)<sub>4</sub>].1H<sub>2</sub>O</b> |                                  |                                   |
| Ni-C=1.881(2)                                                             | C-Ni-C'= 90.7(2)                 | N- Mn-N'=90.6(2)                  |
| Mn-N=2.160(2)                                                             | C-Ni-C''=179.4(3)                | N- Mn-N''=180.0                   |
| Mn-O1= 2.173(2)                                                           | C-Ni-C'''=89.3(3)                | N- Mn-N'''=89.4(3)                |
| C-N=1.149(1)                                                              | Ni-C-N=179.7(4)                  | N- Mn-O1=93.0(4)                  |
|                                                                           | Mn-N-C=169.8(4)                  | N- Mn-O1'= 87.0(3)                |
| <b>Co(H<sub>2</sub>O)<sub>2</sub>[Ni(CN)<sub>4</sub>].1H<sub>2</sub>O</b> |                                  |                                   |
| Ni-C=1.852(2)                                                             | C-Ni-C'=86.9(3)                  | N-Co-N'=89.5(3)                   |
| Co-N=2.062(2)                                                             | C-Ni-C''=174.1(3)                | N-Co-N''=180.0                    |
| Co-O1= 2.108(2)                                                           | C-Ni-C'''=92.8(2)                | N-Co-N'''=90.5(2)                 |
| C-N=1.155(1)                                                              | Ni-C-N=174.1(4)                  | N-Co-O1=90.8(4)                   |
|                                                                           | Co-N-C=178.4(4)                  | N-Co-O1'= 89.2(4)                 |

Table S9. Calculated interatomic distances (in Å) and bond angles (in °) for K phase.

| Bond distance (Å)                                                         |                                 |
|---------------------------------------------------------------------------|---------------------------------|
| <b>Ni(H<sub>2</sub>O)<sub>2</sub>[Ni(CN)<sub>4</sub>].2H<sub>2</sub>O</b> |                                 |
| Ni2 <sub>CN</sub> -C2= 1.910(2)                                           | Ni1 <sub>OH</sub> -O1= 2.350(2) |
| Ni1 <sub>CN</sub> -C1= 1.909(2)                                           | Ni2 <sub>OH</sub> -O2= 2.308(2) |
| Ni2 <sub>OH</sub> -N2= 2.000(2)                                           | C1-N1= 1.142(3)                 |
| Ni1 <sub>OH</sub> -N1= 2.001(2)                                           | C2-N2= 1.142(1)                 |
| <b>Mn(H<sub>2</sub>O)<sub>2</sub>[Ni(CN)<sub>4</sub>].2H<sub>2</sub>O</b> |                                 |
| Ni2-C2= 1.900(2)                                                          | Mn1-O1= 2.360(2)                |
| Ni1-C1= 1.904(2)                                                          | Mn2-O2= 2.369(2)                |
| Mn2-N2= 2.102(2)                                                          | C1-N1= 1.143(1)                 |
| Mn1-N1= 2.100(2)                                                          | C2-N2= 1.145(1)                 |
| <b>Co(H<sub>2</sub>O)<sub>2</sub>[Ni(CN)<sub>4</sub>].2H<sub>2</sub>O</b> |                                 |
| Ni2-C2= 1.905(2)                                                          | Co1-O1= 2.397(2)                |
| Ni1-C1= 1.909(2)                                                          | Co2-O2= 2.304(2)                |
| Co2-N2= 2.024(2)                                                          | C1-N1= 1.138(1)                 |
| Co1-N1= 2.031(2)                                                          | C2-N2= 1.149(1)                 |

Table S10: Relevant bond distances and angles for the series of layer solids under study

| Phase               | O <sub>C</sub> -O <sub>HB1</sub> (Å) | O <sub>HB1</sub> -HB2 (Å) | T-N-C angle (°) |
|---------------------|--------------------------------------|---------------------------|-----------------|
| K (Mn)              | 3.64(2)                              | ---                       | 180             |
| L <sub>0</sub> (Mn) | 2.89(4)                              | 2.78(5)                   | 166.0(3)        |
| L <sub>1</sub> (Mn) | 3.19(2)                              | ---                       | 169.8(4)        |
| K (Co)              | 3.60(3)                              | ---                       | 180             |
| L <sub>0</sub> (Co) | 2.79(5)                              | 2.82(4)                   | 169.2(2)        |
| L <sub>1</sub> (Co) | 3.19(2)                              | ---                       | 174.9(4)        |
| K (Ni)              | 3.574(2)                             | ---                       | 180             |
| L <sub>0</sub> (Ni) | 2.91(1)                              | 2.53(2)                   | 167.4(2)        |
| L <sub>1</sub> (Ni) | 3.16(4)                              | ---                       | 171.8(4)        |

O<sub>C</sub>: Oxygen of coordinated water molecules; O<sub>HB</sub>: Oxygen of hydrogen bonded water molecules
